# Supplementary material
Source: PubMed Central journal article supplement (PMC6312186)
Supplement: NIHMS919748-supplement.pdf [file NIHMS919748-supplement.pdf]

## Supplementary Material

### Risk of early-onset prostate cancer associated with occupation in the Nordic countries

Kathryn Hughes Barry,<sup>a,b,c</sup> Jan Ivar Martinsen,<sup>d</sup> Michael C.R. Alavanja,<sup>c,1</sup> Gabriella Andreotti,<sup>c</sup> Aaron Blair,<sup>c</sup> Johnni Hansen,<sup>e</sup> Kristina Kjærheim,<sup>d</sup> Stella Koutros,<sup>c</sup> Elsebeth Lynge,<sup>f</sup> Pär Sparèn,<sup>g</sup> Laufey Tryggvadottir,<sup>h,i</sup> Elisabete Weiderpass,<sup>d,g,j,k</sup> Sonja I. Berndt,<sup>c</sup> Eero Pukkala<sup>l,m</sup>

<sup>a</sup>Department of Epidemiology and Public Health, University of Maryland School of Medicine, Baltimore, MD, USA

<sup>b</sup>Program in Oncology, University of Maryland Marlene and Stewart Greenebaum Comprehensive Cancer Center, Baltimore, MD, USA

<sup>c</sup>Occupational and Environmental Epidemiology Branch, Division of Cancer Epidemiology and Genetics, National Cancer Institute, National Institutes of Health, Bethesda, MD, USA

<sup>d</sup>Department of Research, Cancer Registry of Norway - Institute of Population-Based Cancer Research, Oslo, Norway

<sup>e</sup>Danish Cancer Society Research Center, Copenhagen, Denmark

<sup>f</sup>University of Copenhagen, Copenhagen, Denmark

<sup>g</sup>Department of Medical Epidemiology and Biostatistics, Karolinska Institutet, Stockholm, Sweden

<sup>h</sup>Icelandic Cancer Registry, Icelandic Cancer Society, Reykjavik, Iceland

<sup>i</sup>Faculty of Medicine, University of Iceland, Reykjavik, Iceland

<sup>j</sup>Genetic Epidemiology Group, Folkhälsan Research Center, Helsinki, Finland

<sup>k</sup>Department of Community Medicine, Faculty of Health Sciences, University of Tromsø, The Arctic University of Norway, Tromsø, Norway

<sup>l</sup>Finnish Cancer Registry, Institute for Statistical and Epidemiological Cancer Research, Helsinki, Finland

<sup>m</sup>Faculty of Social Sciences, University of Tampere, Tampere, Finland

<sup>1</sup>Present address: Graduate Faculty of Biology, Hood College, Frederick, Maryland, USA

## Table of Contents

|                                                                                                                                                                                                                                                           |   |
|-----------------------------------------------------------------------------------------------------------------------------------------------------------------------------------------------------------------------------------------------------------|---|
| Supplementary Table S1. Dates of computerized censuses conducted in the Nordic countries.....                                                                                                                                                             | 3 |
| Supplementary Table S2. Observed (Obs) prostate cancer cases for men 30-49 years of age in the Nordic countries and standardized incidence ratios (SIR) 1961-2005.....                                                                                    | 4 |
| Supplementary Table S3. Observed (Obs) prostate cancer cases for men >50 years of age in the Nordic countries and standardized incidence ratios (SIR) 1961-2005.....                                                                                      | 5 |
| Supplementary Table S4. Observed numbers of prostate cancer cases and standardized incidence ratios among men 30-49 years of age and men 50 years or older, respectively, in the five Nordic countries combined, by occupational category and period..... | 6 |

Supplementary Table S1. Dates of computerized censuses conducted in the Nordic countries

| Country | Computerized census dates | Notes                                                                                                                                                                                                          |
|---------|---------------------------|----------------------------------------------------------------------------------------------------------------------------------------------------------------------------------------------------------------|
| Norway  | 1960, 1970, 1980, 1990    | Computerized registration of census data began in 1960; the 1990 census was excluded from the present study because only a sample of the population was included                                               |
| Sweden  | 1960, 1970, 1980, 1990    | Computerized registration of census data began in 1960                                                                                                                                                         |
| Finland | 1970, 1980, 1990          | Computerized registration of census data began in 1970                                                                                                                                                         |
| Denmark | 1970                      | Computerized registration of census data began in 1970; starting in 1981, Denmark initiated register-based censuses, which collected less detailed occupational information and were not used in present study |
| Iceland | 1981                      | Other censuses conducted during the same time period as the other countries were not computerized                                                                                                              |

Supplementary Table S2. Observed (Obs) prostate cancer cases for men 30-49 years of age in the Nordic countries and standardized incidence ratios (SIR) 1961-2005, red/green denotes significant increase/decrease in risk, expected count shown in square brackets when observed count was zero

| No | Occupational category      | Denmark |             | Finland |             | Iceland |       | Norway |             | Sweden |             | Total  |             |           |
|----|----------------------------|---------|-------------|---------|-------------|---------|-------|--------|-------------|--------|-------------|--------|-------------|-----------|
|    |                            | Obs     | SIR         | Obs     | SIR         | Obs     | SIR   | Obs    | SIR         | Obs    | SIR         | Obs    | SIR         | 95% CI    |
| 1  | Technical workers, etc     | 26      | 1.41        | 43      | 1.11        | [0.37]  | 0.00  | 22     | <b>1.72</b> | 85     | 1.08        | 176    | <b>1.18</b> | 1.01-1.37 |
| 2  | Laboratory assistants      | [0.35]  | 0.00        | [1.02]  | 0.00        | [0.08]  | 0.00  | 1      | 2.11        | 3      | 3.02        | 4      | 1.37        | 0.37-3.51 |
| 3  | Physicians                 | 4       | 3.09        | [2.21]  | 0.00        | [0.09]  | 0.00  | 2      | 1.49        | 4      | 0.78        | 10     | 0.99        | 0.48-1.83 |
| 4  | Dentists                   | [0.50]  | 0.00        | 1       | 2.03        | [0.03]  | 0.00  | 1      | 1.98        | 2      | 1.13        | 4      | 1.21        | 0.33-3.11 |
| 5  | Nurses                     | [0.03]  | 0.00        | 2       | 4.79        | [0.01]  | 0.00  | [0.22] | 0.00        | 1      | 0.66        | 3      | 1.37        | 0.28-4.01 |
| 6  | Assistant nurses           | 1       | 2.06        | [0.46]  | 0.00        | [0.06]  | 0.00  | 1      | 5.41        | 4      | 1.30        | 6      | 1.40        | 0.52-3.06 |
| 7  | Other health workers       | 1       | 0.89        | 4       | 1.89        | [0.04]  | 0.00  | [0.59] | 0.00        | 2      | 0.50        | 7      | 0.89        | 0.36-1.83 |
| 8  | Teachers                   | 7       | 0.82        | 6       | 0.53        | [0.43]  | 0.00  | 5      | 0.56        | 18     | 0.75        | 36     | <b>0.68</b> | 0.48-0.94 |
| 9  | Religious workers etc      | 4       | 1.61        | 13      | 1.18        | [0.30]  | 0.00  | 5      | 1.20        | 28     | 1.00        | 50     | 1.09        | 0.81-1.43 |
| 10 | Artistic workers           | 5       | <b>5.55</b> | 2       | 0.74        | [0.08]  | 0.00  | 2      | 2.08        | 5      | 0.93        | 14     | 1.40        | 0.76-2.34 |
| 11 | Journalists                | [0.48]  | 0.00        | [1.23]  | 0.00        | [0.05]  | 0.00  | 1      | 1.87        | 2      | 0.73        | 3      | 0.59        | 0.12-1.73 |
| 12 | Administrators             | 26      | <b>1.60</b> | 25      | <b>1.60</b> | [0.30]  | 0.00  | 11     | 0.99        | 28     | 1.35        | 90     | <b>1.41</b> | 1.13-1.73 |
| 13 | Clerical workers           | 6       | 0.70        | 21      | <b>2.25</b> | [0.64]  | 0.00  | 5      | 0.64        | 20     | 0.77        | 52     | 1.00        | 0.74-1.31 |
| 14 | Sales agents               | 2       | 0.42        | 20      | 1.26        | 1       | 4.38  | 10     | 1.21        | 53     | 1.23        | 86     | 1.19        | 0.95-1.47 |
| 15 | Shop workers               | 10      | 0.64        | 6       | 0.74        | 1       | 3.05  | 3      | 0.67        | 11     | 0.87        | 31     | 0.76        | 0.51-1.07 |
| 16 | Farmers                    | 13      | 0.61        | 21      | 0.91        | [0.66]  | 0.00  | 7      | 0.71        | 21     | 0.88        | 62     | 0.79        | 0.60-1.01 |
| 17 | Gardeners                  | 1       | 0.32        | 7       | 1.06        | [0.03]  | 0.00  | [3.00] | 0.00        | 8      | 0.60        | 16     | <b>0.61</b> | 0.35-0.99 |
| 18 | Fishermen                  | 3       | 1.67        | [0.58]  | 0.00        | [1.30]  | 0.00  | 3      | 0.69        | 2      | 1.46        | 8      | 0.85        | 0.37-1.68 |
| 19 | Forestry workers           | [0.40]  | 0.00        | 4       | 0.52        | [0.01]  | 0.00  | [1.78] | 0.00        | 9      | 0.92        | 13     | 0.66        | 0.35-1.13 |
| 20 | Miners and quarry workers  | [0.15]  | 0.00        | 1       | 0.69        | [0.02]  | 0.00  | 1      | 0.98        | 1      | 0.31        | 3      | 0.51        | 0.11-1.49 |
| 21 | Seamen                     | 5       | 1.93        | 1       | 0.46        | [0.22]  | 0.00  | 4      | 0.61        | 3      | 0.88        | 13     | 0.87        | 0.46-1.49 |
| 22 | Transport workers          | 3       | 0.90        | 9       | 1.59        | 1       | 5.24  | 4      | 1.57        | 11     | 0.96        | 28     | 1.21        | 0.80-1.75 |
| 23 | Drivers                    | 8       | 0.57        | 23      | 1.00        | [0.53]  | 0.00  | 11     | 1.07        | 35     | 0.97        | 77     | 0.92        | 0.72-1.14 |
| 24 | Postal workers             | 2       | 0.65        | 4       | 0.94        | 1       | 19.71 | 2      | 1.15        | 14     | 1.55        | 23     | 1.26        | 0.80-1.90 |
| 25 | Textile workers            | 1       | 0.59        | [1.45]  | 0.00        | [0.09]  | 0.00  | 1      | 1.02        | 2      | 0.49        | 4      | 0.48        | 0.13-1.24 |
| 26 | Shoe and leather workers   | [0.35]  | 0.00        | 1       | 1.73        | [0.02]  | 0.00  | [0.32] | 0.00        | 2      | 1.74        | 3      | 1.24        | 0.26-3.63 |
| 27 | Smelting workers           | 2       | 0.33        | 2       | 0.76        | [0.15]  | 0.00  | 2      | 0.97        | 5      | 0.58        | 11     | 0.57        | 0.28-1.01 |
| 28 | Mechanics                  | 11      | 0.75        | 27      | 0.93        | 1       | 1.27  | 18     | 1.26        | 62     | 0.96        | 119    | 0.96        | 0.80-1.15 |
| 29 | Plumbers                   | 1       | 0.68        | 4       | 0.89        | [0.10]  | 0.00  | 2      | 1.05        | 11     | 1.57        | 18     | 1.20        | 0.71-1.90 |
| 30 | Welders                    | -       | -           | 9       | 1.43        | 1       | 16.90 | 1      | 0.43        | 12     | 1.21        | 23     | 1.24        | 0.78-1.86 |
| 31 | Electrical workers         | 7       | 1.64        | 7       | <b>0.46</b> | 1       | 1.78  | 5      | 0.75        | 32     | 1.18        | 52     | 0.97        | 0.72-1.27 |
| 32 | Wood workers               | 7       | 0.80        | 15      | 0.81        | [0.33]  | 0.00  | 11     | 1.05        | 22     | 0.73        | 55     | 0.81        | 0.61-1.05 |
| 33 | Painters                   | 1       | 0.32        | 1       | 0.22        | [0.12]  | 0.00  | 2      | 1.07        | 16     | 1.70        | 20     | 1.04        | 0.64-1.61 |
| 34 | Other construction workers | 9       | 1.04        | 11      | 1.00        | 1       | 1.12  | 4      | 1.29        | 12     | 0.74        | 37     | 0.93        | 0.65-1.28 |
| 35 | Bricklayers                | 5       | 1.50        | 3       | 1.37        | -       | -     | 1      | 1.01        | 1      | 0.33        | 10     | 1.05        | 0.51-1.94 |
| 36 | Printers                   | [2.63]  | 0.00        | 2       | 0.60        | [0.12]  | 0.00  | 1      | 0.57        | 8      | 1.15        | 11     | 0.75        | 0.37-1.33 |
| 37 | Chemical process workers   | 2       | 1.31        | 4       | 1.05        | [0.04]  | 0.00  | 3      | 1.40        | 5      | 0.70        | 14     | 0.95        | 0.52-1.60 |
| 38 | Food workers               | 7       | 1.15        | 2       | 0.71        | 2       | 4.02  | 1      | 0.36        | 6      | 0.83        | 18     | 0.93        | 0.55-1.47 |
| 39 | Beverage workers           | [0.78]  | 0.00        | 1       | 6.98        | [0.01]  | 0.00  | [0.12] | 0.00        | 1      | 2.65        | 2      | 1.40        | 0.17-5.05 |
| 40 | Tobacco workers            | [0.07]  | 0.00        | [0.02]  | 0.00        | [0.00]  | 0.00  | [0.03] | 0.00        | [0.05] | 0.00        | [0.17] | 0.00        | 0.00-21.6 |
| 41 | Glass makers etc           | 5       | 1.59        | 4       | 0.84        | [0.10]  | 0.00  | 2      | 1.07        | 11     | 1.23        | 22     | 1.17        | 0.73-1.77 |
| 42 | Packers                    | 3       | 1.18        | 4       | 0.53        | [0.28]  | 0.00  | 7      | 1.72        | 22     | 1.48        | 36     | 1.23        | 0.86-1.70 |
| 43 | Engine operators           | 4       | 1.14        | 9       | 0.70        | [0.50]  | 0.00  | 5      | 1.12        | 10     | 0.59        | 28     | 0.73        | 0.49-1.06 |
| 44 | Public safety workers      | [2.47]  | 0.00        | 13      | 1.83        | [0.23]  | 0.00  | 4      | 1.82        | 25     | <b>1.99</b> | 42     | <b>1.71</b> | 1.23-2.31 |
| 45 | Cooks and stewards         | 1       | 2.68        | 1       | 0.83        | [0.19]  | 0.00  | 1      | 0.70        | 2      | 0.56        | 5      | 0.74        | 0.24-1.73 |
| 46 | Domestic assistants        | [0.01]  | 0.00        | [0.03]  | 0.00        | [0.00]  | 0.00  | [0.02] | 0.00        | 1      | 0.91        | 1      | 0.86        | 0.02-4.77 |
| 47 | Waiters                    | 1       | 1.43        | [1.25]  | 0.00        | [0.03]  | 0.00  | [0.52] | 0.00        | [1.48] | 0.00        | 1      | 0.25        | 0.01-1.40 |
| 48 | Building caretakers        | 4       | 1.56        | 5       | 0.93        | [0.04]  | 0.00  | 1      | 0.78        | 9      | 0.91        | 19     | 0.99        | 0.60-1.55 |
| 49 | Chimney sweeps             | [0.11]  | 0.00        | 1       | 3.09        | -       | -     | [0.11] | 0.00        | 1      | 1.65        | 2      | 1.74        | 0.21-6.29 |
| 50 | Hairdressers               | 1       | 1.49        | 1       | 6.74        | [0.02]  | 0.00  | [0.28] | 0.00        | [1.09] | 0.00        | 2      | 0.90        | 0.11-3.27 |
| 51 | Launderers                 | [0.33]  | 0.00        | [0.13]  | 0.00        | [0.00]  | 0.00  | [0.15] | 0.00        | [0.86] | 0.00        | [1.47] | 0.00        | 0.00-2.50 |
| 52 | Military personnel         | 11      | <b>4.43</b> | 8       | <b>2.43</b> | -       | -     | 3      | 1.42        | 6      | 0.95        | 28     | <b>1.97</b> | 1.31-2.85 |
| 53 | Other workers              | 13      | 1.21        | 5       | 0.78        | 3       | 3.59  | 5      | 0.71        | 19     | 1.19        | 45     | 1.10        | 0.80-1.47 |
| 54 | Economically inactive      | 5       | 0.95        | 25      | 0.95        | [0.98]  | 0.00  | 6      | 0.97        | 42     | 0.85        | 78     | 0.89        | 0.70-1.11 |
| 55 | All categories             | 228     | 1.00        | 378     | 1.00        | 13      | 1.00  | 187    | 1.00        | 715    | 1.00        | 1521   | 1.00        | Ref.      |

Supplementary Table S3. Observed (Obs) prostate cancer cases for men  $\geq 50$  years of age in the Nordic countries and standardized incidence ratios (SIR) 1961-2005, red/green denotes significant increase/decrease in risk, expected count shown in square brackets when observed count was zero

| No | Occupational category      | Denmark |             | Finland |             | Iceland |             | Norway |             | Sweden |             | Total  |             |           |
|----|----------------------------|---------|-------------|---------|-------------|---------|-------------|--------|-------------|--------|-------------|--------|-------------|-----------|
|    |                            | Obs     | SIR         | Obs     | SIR         | Obs     | SIR         | Obs    | SIR         | Obs    | SIR         | Obs    | SIR         | 95% CI    |
| 1  | Technical workers, etc     | 2280    | <b>1.09</b> | 3843    | <b>1.17</b> | 49      | 1.17        | 2351   | <b>1.06</b> | 17742  | <b>1.11</b> | 26265  | <b>1.11</b> | 1.09-1.12 |
| 2  | Laboratory assistants      | 41      | 0.97        | 82      | 1.06        | 8       | 1.01        | 117    | 1.07        | 81     | 1.11        | 329    | 1.06        | 0.95-1.18 |
| 3  | Physicians                 | 213     | <b>1.19</b> | 240     | <b>1.26</b> | 23      | 1.23        | 330    | 1.05        | 767    | 1.07        | 1573   | <b>1.11</b> | 1.06-1.17 |
| 4  | Dentists                   | 62      | 1.26        | 47      | 1.18        | 1       | 0.24        | 183    | <b>1.29</b> | 439    | <b>1.20</b> | 732    | <b>1.22</b> | 1.13-1.31 |
| 5  | Nurses                     | [2.12]  | 0.00        | 9       | 1.23        | [0.03]  | 0.00        | 11     | 1.24        | 25     | 1.07        | 45     | 1.08        | 0.79-1.44 |
| 6  | Assistant nurses           | 43      | 0.87        | 8       | 1.44        | 2       | 1.30        | 54     | 1.00        | 209    | 0.92        | 316    | 0.94        | 0.84-1.05 |
| 7  | Other health workers       | 197     | <b>1.27</b> | 203     | 1.12        | 5       | 1.01        | 121    | 1.04        | 607    | 1.02        | 1133   | <b>1.08</b> | 1.02-1.14 |
| 8  | Teachers                   | 1016    | <b>1.12</b> | 1632    | <b>1.12</b> | 80      | 1.23        | 1817   | <b>1.09</b> | 4467   | <b>1.07</b> | 9012   | <b>1.09</b> | 1.07-1.11 |
| 9  | Religious workers etc      | 470     | <b>1.14</b> | 860     | <b>1.22</b> | 65      | <b>1.52</b> | 995    | <b>1.13</b> | 3395   | <b>1.13</b> | 5785   | <b>1.15</b> | 1.12-1.18 |
| 10 | Artistic workers           | 159     | <b>1.26</b> | 300     | <b>1.13</b> | 15      | 1.26        | 271    | 1.05        | 1031   | <b>1.08</b> | 1776   | <b>1.10</b> | 1.05-1.15 |
| 11 | Journalists                | 66      | 1.14        | 133     | 1.05        | 8       | 1.22        | 113    | 1.04        | 439    | 1.01        | 759    | 1.03        | 0.96-1.11 |
| 12 | Administrators             | 2787    | <b>1.13</b> | 2826    | <b>1.30</b> | 137     | 1.12        | 3592   | <b>1.14</b> | 7221   | <b>1.16</b> | 16563  | <b>1.17</b> | 1.15-1.19 |
| 13 | Clerical workers           | 1095    | 1.03        | 1593    | <b>1.13</b> | 143     | 1.06        | 2475   | <b>1.06</b> | 7099   | <b>1.07</b> | 12405  | <b>1.07</b> | 1.05-1.09 |
| 14 | Sales agents               | 660     | <b>1.20</b> | 2131    | <b>1.07</b> | 84      | 1.22        | 3074   | <b>1.11</b> | 10397  | <b>1.09</b> | 16346  | <b>1.10</b> | 1.08-1.12 |
| 15 | Shop workers               | 2653    | <b>1.05</b> | 832     | 0.99        | 44      | 0.97        | 1032   | 1.02        | 3167   | 1.02        | 7728   | <b>1.03</b> | 1.00-1.05 |
| 16 | Farmers                    | 4707    | <b>0.94</b> | 10218   | 0.99        | 167     | <b>0.81</b> | 8852   | <b>1.04</b> | 17017  | 1.00        | 40961  | 1.00        | 0.99-1.01 |
| 17 | Gardeners                  | 709     | 0.99        | 1196    | <b>0.84</b> | 6       | 0.96        | 1792   | <b>0.90</b> | 5495   | <b>0.89</b> | 9198   | <b>0.89</b> | 0.87-0.91 |
| 18 | Fishermen                  | 200     | 0.89        | 127     | 0.97        | 95      | 1.00        | 2216   | <b>0.88</b> | 583    | <b>0.89</b> | 3221   | <b>0.89</b> | 0.86-0.92 |
| 19 | Forestry workers           | 90      | 0.84        | 1237    | <b>0.76</b> | [0.98]  | 0.00        | 1345   | <b>0.89</b> | 3830   | <b>0.86</b> | 6502   | <b>0.85</b> | 0.82-0.87 |
| 20 | Miners and quarry workers  | 27      | 0.83        | 251     | 0.99        | [1.67]  | 0.00        | 357    | 0.92        | 927    | <b>0.87</b> | 1562   | <b>0.89</b> | 0.85-0.94 |
| 21 | Seamen                     | 258     | 1.12        | 417     | <b>1.20</b> | 25      | 0.85        | 1856   | 0.99        | 1044   | <b>1.12</b> | 3600   | <b>1.05</b> | 1.02-1.09 |
| 22 | Transport workers          | 507     | 0.95        | 1090    | 1.02        | 67      | 1.03        | 1062   | 1.02        | 3378   | 1.02        | 6104   | 1.02        | 0.99-1.04 |
| 23 | Drivers                    | 1640    | 0.96        | 3285    | 0.99        | 74      | 0.85        | 2725   | 1.01        | 7702   | 0.99        | 15426  | 0.99        | 0.97-1.00 |
| 24 | Postal workers             | 326     | 1.03        | 509     | 1.02        | 19      | 1.60        | 544    | 0.99        | 1754   | 1.02        | 3152   | 1.02        | 0.98-1.06 |
| 25 | Textile workers            | 282     | <b>0.88</b> | 381     | 1.10        | 11      | <b>0.52</b> | 636    | 1.01        | 1795   | <b>0.91</b> | 3105   | <b>0.94</b> | 0.91-0.98 |
| 26 | Shoe and leather workers   | 70      | 0.86        | 138     | 0.93        | 2       | 0.43        | 256    | 0.96        | 810    | 1.05        | 1276   | 1.00        | 0.95-1.06 |
| 27 | Smelting workers           | 655     | 0.97        | 457     | <b>0.90</b> | 19      | 0.67        | 857    | 1.06        | 2797   | <b>0.92</b> | 4785   | <b>0.94</b> | 0.92-0.97 |
| 28 | Mechanics                  | 1768    | 0.96        | 3150    | 0.99        | 80      | 1.01        | 3607   | <b>0.96</b> | 13668  | <b>0.96</b> | 22273  | <b>0.96</b> | 0.95-0.98 |
| 29 | Plumbers                   | 176     | 1.10        | 559     | 1.06        | 15      | 1.11        | 396    | 0.94        | 1628   | 0.99        | 2774   | 1.00        | 0.96-1.04 |
| 30 | Welders                    | -       | -           | 526     | <b>1.10</b> | 4       | 0.87        | 421    | <b>0.90</b> | 1897   | 1.02        | 2848   | 1.01        | 0.98-1.05 |
| 31 | Electrical workers         | 392     | 0.95        | 1296    | 0.98        | 38      | 0.83        | 1674   | 1.00        | 4843   | 0.99        | 8243   | 0.99        | 0.97-1.01 |
| 32 | Wood workers               | 1212    | <b>0.94</b> | 3321    | <b>0.94</b> | 44      | 0.89        | 4674   | 0.99        | 9401   | <b>0.97</b> | 18652  | <b>0.97</b> | 0.95-0.98 |
| 33 | Painters                   | 383     | 0.92        | 720     | 0.99        | 14      | 0.69        | 762    | 0.99        | 2742   | 0.99        | 4621   | 0.98        | 0.95-1.01 |
| 34 | Other construction workers | 1472    | <b>0.87</b> | 2020    | <b>0.92</b> | 94      | 1.01        | 837    | 0.95        | 5125   | 1.00        | 9548   | <b>0.95</b> | 0.93-0.97 |
| 35 | Bricklayers                | 482     | 1.03        | 376     | 1.03        | -       | -           | 431    | 0.93        | 1217   | 0.96        | 2506   | 0.98        | 0.94-1.02 |
| 36 | Printers                   | 295     | 1.03        | 347     | 1.09        | 15      | 0.98        | 438    | 0.98        | 1500   | 1.00        | 2595   | 1.01        | 0.98-1.05 |
| 37 | Chemical process workers   | 259     | 0.91        | 479     | <b>0.87</b> | 8       | 0.87        | 870    | <b>0.84</b> | 2121   | <b>0.93</b> | 3737   | <b>0.90</b> | 0.87-0.92 |
| 38 | Food workers               | 869     | 0.97        | 380     | 0.95        | 69      | 0.88        | 1154   | 0.99        | 2304   | 0.97        | 4776   | 0.97        | 0.94-1.00 |
| 39 | Beverage workers           | 111     | 1.00        | 17      | 0.63        | [1.34]  | 0.00        | 8      | 0.82        | 123    | 0.95        | 259    | 0.93        | 0.82-1.05 |
| 40 | Tobacco workers            | 22      | 1.15        | 4       | 0.78        | [0.11]  | 0.00        | 13     | 0.73        | 11     | 1.07        | 50     | 0.95        | 0.71-1.26 |
| 41 | Glass makers etc           | 494     | 0.92        | 562     | 1.00        | 18      | 1.35        | 520    | 0.95        | 2368   | <b>0.93</b> | 3962   | <b>0.94</b> | 0.91-0.97 |
| 42 | Packers                    | 481     | 0.98        | 1151    | 0.97        | 40      | 0.87        | 1745   | 1.00        | 4402   | 0.97        | 7819   | 0.98        | 0.96-1.00 |
| 43 | Engine operators           | 461     | 0.99        | 1582    | 0.99        | 61      | 1.09        | 943    | 1.02        | 3706   | <b>0.97</b> | 6753   | 0.98        | 0.96-1.01 |
| 44 | Public safety workers      | 509     | <b>1.14</b> | 1060    | <b>1.15</b> | 47      | 1.11        | 777    | 1.04        | 2458   | <b>1.10</b> | 4851   | <b>1.10</b> | 1.07-1.14 |
| 45 | Cooks and stewards         | 39      | 1.19        | 41      | 0.84        | 19      | 1.06        | 310    | 1.01        | 337    | 0.90        | 746    | 0.96        | 0.89-1.03 |
| 46 | Domestic assistants        | 1       | 2.86        | [4.21]  | <b>0.00</b> | [0.06]  | 0.00        | 2      | 0.83        | 16     | 0.68        | 19     | <b>0.62</b> | 0.38-0.98 |
| 47 | Waiters                    | 74      | 1.02        | 50      | 1.12        | 2       | 1.14        | 149    | 1.10        | 212    | 1.09        | 487    | 1.09        | 0.99-1.19 |
| 48 | Building caretakers        | 502     | 1.03        | 777     | 0.99        | 25      | 1.20        | 388    | 1.02        | 1750   | 1.01        | 3442   | 1.01        | 0.98-1.04 |
| 49 | Chimney sweeps             | 11      | 0.94        | 51      | 0.93        | -       | -           | 40     | 1.05        | 135    | 1.06        | 237    | 1.02        | 0.90-1.16 |
| 50 | Hairdressers               | 137     | 0.99        | 6       | <b>0.40</b> | 3       | 1.12        | 111    | 1.00        | 437    | 0.95        | 694    | 0.95        | 0.88-1.03 |
| 51 | Launderers                 | 67      | 0.99        | 20      | 1.26        | 3       | 1.51        | 75     | 1.12        | 345    | 1.05        | 510    | 1.06        | 0.97-1.16 |
| 52 | Military personnel         | 229     | 1.13        | 317     | 1.06        | -       | -           | 638    | 1.06        | 1504   | <b>1.11</b> | 2688   | <b>1.09</b> | 1.05-1.13 |
| 53 | Other workers              | 1388    | 0.96        | 769     | <b>0.86</b> | 192     | 1.08        | 3341   | 0.98        | 5383   | <b>0.97</b> | 11073  | <b>0.96</b> | 0.95-0.98 |
| 54 | Economically inactive      | 1504    | <b>0.93</b> | 3648    | <b>0.81</b> | 97      | 0.86        | 1233   | <b>0.72</b> | 6134   | <b>0.78</b> | 12616  | <b>0.80</b> | 0.78-0.81 |
| 55 | All categories             | 34551   | 1.00        | 57274   | 1.00        | 2037    | 1.00        | 64591  | 1.00        | 179985 | 1.00        | 338438 | 1.00        | Ref       |

Supplementary Table S4. Observed numbers of prostate cancer cases and standardized incidence ratios among men 30-49 years of age and men 50 years or older, respectively, in the five Nordic countries combined, by occupational category and period

| Occupation <sup>a</sup>   | Men 35-49 years of age |                  |                     |                     |                  |                  |                     |                     | Men 50 years of age or older |                  |                     |                     |                  |                  |                     |                     |
|---------------------------|------------------------|------------------|---------------------|---------------------|------------------|------------------|---------------------|---------------------|------------------------------|------------------|---------------------|---------------------|------------------|------------------|---------------------|---------------------|
|                           | 1961-1985              |                  |                     |                     | 1986-2005        |                  |                     |                     | 1961-1985                    |                  |                     |                     | 1986-2005        |                  |                     |                     |
|                           | Obs <sup>b</sup>       | SIR <sup>c</sup> | SIR_lb <sup>c</sup> | SIR_ub <sup>c</sup> | Obs <sup>b</sup> | SIR <sup>c</sup> | SIR_lb <sup>c</sup> | SIR_ub <sup>c</sup> | Obs <sup>b</sup>             | SIR <sup>c</sup> | SIR_lb <sup>c</sup> | SIR_ub <sup>c</sup> | Obs <sup>b</sup> | SIR <sup>c</sup> | SIR_lb <sup>c</sup> | SIR_ub <sup>c</sup> |
| Technical workers, etc    | 56                     | 1.11             | 0.84                | 1.44                | 120              | <b>1.22</b>      | <b>1.01</b>         | <b>1.46</b>         | 4512                         | <b>1.09</b>      | <b>1.06</b>         | <b>1.12</b>         | 21753            | <b>1.11</b>      | <b>1.10</b>         | <b>1.13</b>         |
| Laboratory assistants     | 3                      | 3.79             | 0.78                | 11.07               | 1                | 0.47             | 0.01                | 2.62                | 34                           | 0.88             | 0.61                | 1.22                | 295              | 1.09             | 0.97                | 1.22                |
| Physicians                | 6                      | 2.05             | 0.75                | 4.47                | 4                | 0.56             | 0.15                | 1.43                | 293                          | 1.05             | 0.94                | 1.18                | 1280             | <b>1.12</b>      | <b>1.06</b>         | <b>1.19</b>         |
| Dentists                  | 2                      | 1.57             | 0.19                | 5.66                | 2                | 0.99             | 0.12                | 3.57                | 162                          | <b>1.19</b>      | <b>1.02</b>         | <b>1.39</b>         | 570              | <b>1.23</b>      | <b>1.13</b>         | <b>1.33</b>         |
| Nurses                    | [0.08]                 | 0.00             | 0.00                | 44.25               | 3                | 1.43             | 0.29                | 4.17                | [1.2]                        | 0.00             | 0.00                | 3.16                | 45               | 1.11             | 0.81                | 1.48                |
| Assistant nurses          | 2                      | 2.34             | 0.28                | 8.45                | 4                | 1.17             | 0.32                | 3.00                | 77                           | 0.96             | 0.75                | 1.19                | 239              | 0.93             | 0.82                | 1.06                |
| Other health workers      | 3                      | 1.36             | 0.28                | 3.98                | 4                | 0.70             | 0.19                | 1.80                | 236                          | 1.04             | 0.91                | 1.18                | 897              | <b>1.09</b>      | <b>1.02</b>         | <b>1.16</b>         |
| Teachers                  | 13                     | 0.69             | 0.37                | 1.17                | 23               | 0.68             | 0.43                | 1.01                | 1452                         | 1.04             | 0.99                | 1.10                | 7560             | <b>1.10</b>      | <b>1.08</b>         | <b>1.13</b>         |
| Religious workers etc     | 9                      | 1.09             | 0.50                | 2.07                | 41               | 1.09             | 0.78                | 1.47                | 1177                         | <b>1.11</b>      | <b>1.05</b>         | <b>1.18</b>         | 4608             | <b>1.16</b>      | <b>1.12</b>         | <b>1.19</b>         |
| Artistic workers          | 9                      | <b>2.85</b>      | <b>1.30</b>         | <b>5.41</b>         | 5                | 0.73             | 0.24                | 1.70                | 373                          | <b>1.17</b>      | <b>1.06</b>         | <b>1.30</b>         | 1403             | <b>1.08</b>      | <b>1.02</b>         | <b>1.14</b>         |
| Journalists               | 1                      | 0.68             | 0.02                | 3.79                | 2                | 0.56             | 0.07                | 2.02                | 132                          | 0.87             | 0.73                | 1.04                | 627              | 1.07             | 0.99                | 1.16                |
| Administrators            | 50                     | <b>1.72</b>      | <b>1.28</b>         | <b>2.27</b>         | 40               | 1.15             | 0.82                | 1.56                | 3932                         | <b>1.14</b>      | <b>1.11</b>         | <b>1.18</b>         | 12631            | <b>1.18</b>      | <b>1.16</b>         | <b>1.20</b>         |
| Clerical workers          | 17                     | 0.75             | 0.44                | 1.20                | 35               | 1.19             | 0.83                | 1.65                | 2943                         | <b>1.08</b>      | <b>1.04</b>         | <b>1.12</b>         | 9462             | <b>1.07</b>      | <b>1.05</b>         | <b>1.09</b>         |
| Sales agents              | 22                     | 0.89             | 0.56                | 1.35                | 64               | <b>1.35</b>      | <b>1.04</b>         | <b>1.72</b>         | 3954                         | <b>1.09</b>      | <b>1.06</b>         | <b>1.13</b>         | 12392            | <b>1.10</b>      | <b>1.08</b>         | <b>1.12</b>         |
| Shop workers              | 17                     | 0.74             | 0.43                | 1.19                | 14               | 0.77             | 0.42                | 1.30                | 1595                         | 1.03             | 0.98                | 1.09                | 6133             | <b>1.03</b>      | <b>1.00</b>         | <b>1.05</b>         |
| Farmers                   | 35                     | 0.72             | 0.50                | 1.01                | 27               | 0.88             | 0.58                | 1.28                | 13061                        | <b>0.96</b>      | <b>0.95</b>         | <b>0.98</b>         | 27900            | <b>1.01</b>      | <b>1.00</b>         | <b>1.03</b>         |
| Gardeners                 | 8                      | 0.55             | 0.24                | 1.08                | 8                | 0.69             | 0.30                | 1.36                | 2776                         | <b>0.87</b>      | <b>0.84</b>         | <b>0.91</b>         | 6422             | <b>0.90</b>      | <b>0.88</b>         | <b>0.92</b>         |
| Fishermen                 | 5                      | 0.91             | 0.30                | 2.12                | 3                | 0.77             | 0.16                | 2.26                | 1098                         | <b>0.87</b>      | <b>0.82</b>         | <b>0.93</b>         | 2123             | <b>0.90</b>      | <b>0.86</b>         | <b>0.94</b>         |
| Forestry workers          | 5                      | 0.52             | 0.17                | 1.21                | 8                | 0.80             | 0.34                | 1.57                | 1943                         | <b>0.81</b>      | <b>0.78</b>         | <b>0.85</b>         | 4559             | <b>0.86</b>      | <b>0.83</b>         | <b>0.89</b>         |
| Miners and quarry workers | 2                      | 0.74             | 0.09                | 2.68                | 1                | 0.32             | 0.01                | 1.76                | 468                          | 0.92             | 0.84                | 1.00                | 1094             | <b>0.89</b>      | <b>0.83</b>         | <b>0.94</b>         |
| Seamen                    | 9                      | 1.14             | 0.52                | 2.17                | 4                | 0.57             | 0.15                | 1.45                | 897                          | <b>1.09</b>      | <b>1.02</b>         | <b>1.16</b>         | 2703             | 1.04             | 1.00                | 1.08                |

|                            |        |             |             |             |        |             |             |             |      |             |             |             |       |             |             |             |
|----------------------------|--------|-------------|-------------|-------------|--------|-------------|-------------|-------------|------|-------------|-------------|-------------|-------|-------------|-------------|-------------|
| Transport workers          | 12     | 1.06        | 0.55        | 1.86        | 16     | 1.35        | 0.77        | 2.19        | 1172 | 1.01        | 0.96        | 1.07        | 4932  | 1.02        | 0.99        | 1.04        |
| Drivers                    | 26     | 0.73        | 0.48        | 1.07        | 51     | 1.05        | 0.78        | 1.38        | 3309 | <b>1.05</b> | <b>1.01</b> | <b>1.08</b> | 12117 | <b>0.97</b> | <b>0.96</b> | <b>0.99</b> |
| Postal workers             | 8      | 1.25        | 0.54        | 2.46        | 15     | 1.27        | 0.71        | 2.10        | 817  | 1.03        | 0.96        | 1.11        | 2335  | 1.01        | 0.97        | 1.06        |
| Textile workers            | 3      | 0.59        | 0.12        | 1.72        | 1      | 0.31        | 0.01        | 1.75        | 966  | 0.95        | 0.89        | 1.01        | 2139  | <b>0.94</b> | <b>0.90</b> | <b>0.98</b> |
| Shoe and leather workers   | 1      | 0.67        | 0.02        | 3.72        | 2      | 2.17        | 0.26        | 7.84        | 520  | 1.06        | 0.97        | 1.15        | 756   | 0.96        | 0.90        | 1.04        |
| Smelting workers           | 4      | <b>0.35</b> | <b>0.10</b> | <b>0.89</b> | 7      | 0.87        | 0.35        | 1.80        | 1537 | 1.04        | 0.98        | 1.09        | 3248  | <b>0.90</b> | <b>0.87</b> | <b>0.94</b> |
| Mechanics                  | 50     | 1.05        | 0.78        | 1.39        | 69     | 0.91        | 0.71        | 1.15        | 4929 | 0.99        | 0.96        | 1.02        | 17344 | <b>0.95</b> | <b>0.94</b> | <b>0.97</b> |
| Plumbers                   | 4      | 0.71        | 0.19        | 1.83        | 14     | 1.50        | 0.82        | 2.51        | 601  | 1.06        | 0.98        | 1.15        | 2173  | 0.98        | 0.94        | 1.03        |
| Welders                    | 6      | 1.13        | 0.42        | 2.46        | 17     | 1.28        | 0.75        | 2.05        | 409  | 1.00        | 0.91        | 1.11        | 2439  | 1.01        | 0.97        | 1.06        |
| Electrical workers         | 24     | 1.42        | 0.91        | 2.12        | 28     | 0.76        | 0.50        | 1.10        | 1561 | 0.98        | 0.93        | 1.03        | 6682  | 0.99        | 0.96        | 1.01        |
| Wood workers               | 23     | 0.83        | 0.52        | 1.24        | 32     | 0.80        | 0.54        | 1.12        | 5513 | 0.97        | 0.95        | 1.00        | 13139 | <b>0.96</b> | <b>0.95</b> | <b>0.98</b> |
| Painters                   | 12     | 1.43        | 0.74        | 2.50        | 8      | 0.74        | 0.32        | 1.46        | 1366 | 1.04        | 0.98        | 1.10        | 3255  | <b>0.96</b> | <b>0.93</b> | <b>0.99</b> |
| Other construction workers | 21     | 1.13        | 0.70        | 1.72        | 16     | 0.76        | 0.43        | 1.23        | 2729 | <b>0.96</b> | <b>0.92</b> | <b>1.00</b> | 6819  | <b>0.95</b> | <b>0.93</b> | <b>0.97</b> |
| Bricklayers                | 7      | 1.25        | 0.50        | 2.57        | 3      | 0.77        | 0.16        | 2.25        | 758  | 1.04        | 0.96        | 1.11        | 1748  | 0.96        | 0.91        | 1.00        |
| Printers                   | 2      | 0.34        | 0.04        | 1.21        | 9      | 1.02        | 0.47        | 1.94        | 631  | 1.06        | 0.98        | 1.15        | 1964  | 1.00        | 0.96        | 1.05        |
| Chemical process workers   | 10     | 1.60        | 0.77        | 2.93        | 4      | 0.48        | 0.13        | 1.22        | 1267 | <b>0.94</b> | <b>0.89</b> | <b>0.99</b> | 2470  | <b>0.87</b> | <b>0.84</b> | <b>0.91</b> |
| Food workers               | 10     | 0.90        | 0.43        | 1.66        | 8      | 0.97        | 0.42        | 1.90        | 1365 | 1.01        | 0.95        | 1.06        | 3411  | <b>0.96</b> | <b>0.93</b> | <b>0.99</b> |
| Beverage workers           | [0.95] | 0.00        | 0.00        | 3.87        | 2      | 4.19        | 0.51        | 15.12       | 88   | 1.01        | 0.81        | 1.24        | 171   | 0.90        | 0.77        | 1.04        |
| Tobacco workers            | [0.11] | 0.00        | 0.00        | 34.26       | [0.06] | 0.00        | 0.00        | 58.13       | 16   | 0.97        | 0.55        | 1.57        | 34    | 0.95        | 0.66        | 1.32        |
| Glass makers etc           | 14     | 1.72        | 0.94        | 2.88        | 8      | 0.75        | 0.32        | 1.48        | 1090 | 0.96        | 0.90        | 1.02        | 2872  | <b>0.94</b> | <b>0.90</b> | <b>0.97</b> |
| Packers                    | 11     | 0.93        | 0.47        | 1.67        | 25     | 1.43        | 0.93        | 2.11        | 2740 | <b>1.05</b> | <b>1.01</b> | <b>1.09</b> | 5079  | <b>0.94</b> | <b>0.91</b> | <b>0.97</b> |
| Engine operators           | 12     | 0.90        | 0.47        | 1.57        | 16     | 0.65        | 0.37        | 1.05        | 1504 | 1.02        | 0.97        | 1.08        | 5249  | <b>0.97</b> | <b>0.94</b> | <b>1.00</b> |
| Public safety workers      | 11     | 1.47        | 0.73        | 2.63        | 31     | <b>1.81</b> | <b>1.23</b> | <b>2.57</b> | 1017 | <b>1.08</b> | <b>1.01</b> | <b>1.14</b> | 3834  | <b>1.11</b> | <b>1.08</b> | <b>1.15</b> |
| Cooks and stewards         | 1      | 0.62        | 0.02        | 3.44        | 4      | 0.78        | 0.21        | 2.00        | 208  | <b>1.19</b> | <b>1.04</b> | <b>1.37</b> | 538   | <b>0.89</b> | <b>0.81</b> | <b>0.97</b> |

|                       |        |             |             |             |        |      |      |       |       |             |             |             |        |             |             |             |
|-----------------------|--------|-------------|-------------|-------------|--------|------|------|-------|-------|-------------|-------------|-------------|--------|-------------|-------------|-------------|
| Domestic assistants   | [0.03] | 0.00        | 0.00        | 114.65      | 1      | 0.88 | 0.02 | 4.90  | 3     | 0.53        | 0.11        | 1.55        | 16     | 0.65        | 0.37        | 1.05        |
| Waiters               | 1      | 0.73        | 0.02        | 4.08        | [2.6]  | 0.00 | 0.00 | 1.41  | 123   | <b>1.22</b> | <b>1.01</b> | <b>1.45</b> | 364    | 1.05        | 0.95        | 1.16        |
| Building caretakers   | 6      | 1.13        | 0.42        | 2.46        | 13     | 0.94 | 0.50 | 1.61  | 1121  | <b>1.07</b> | <b>1.01</b> | <b>1.13</b> | 2321   | 0.98        | 0.94        | 1.02        |
| Chimney sweeps        | [0.44] | 0.00        | 0.00        | 8.31        | 2      | 2.84 | 0.34 | 10.26 | 59    | 1.12        | 0.86        | 1.45        | 178    | 0.99        | 0.85        | 1.15        |
| Hairdressers          | 1      | 0.72        | 0.02        | 4.00        | 1      | 1.22 | 0.03 | 6.82  | 224   | 1.05        | 0.91        | 1.19        | 470    | <b>0.91</b> | <b>0.83</b> | <b>1.00</b> |
| Launderers            | [0.91] | 0.00        | 0.00        | 4.06        | [0.57] | 0.00 | 0.00 | 6.52  | 180   | <b>1.31</b> | <b>1.13</b> | <b>1.52</b> | 330    | 0.96        | 0.86        | 1.07        |
| Military personnel    | 16     | <b>2.52</b> | <b>1.44</b> | <b>4.09</b> | 12     | 1.53 | 0.79 | 2.67  | 385   | <b>1.12</b> | <b>1.01</b> | <b>1.23</b> | 2303   | <b>1.09</b> | <b>1.04</b> | <b>1.13</b> |
| Other workers         | 18     | 0.85        | 0.51        | 1.35        | 27     | 1.35 | 0.89 | 1.97  | 4010  | 1.01        | 0.98        | 1.04        | 7063   | <b>0.94</b> | <b>0.92</b> | <b>0.96</b> |
| Economically inactive | 21     | 1.06        | 0.65        | 1.62        | 57     | 0.84 | 0.63 | 1.09  | 5912  | <b>0.90</b> | <b>0.87</b> | <b>0.92</b> | 6704   | <b>0.73</b> | <b>0.71</b> | <b>0.74</b> |
| All categories        | 609    | REF         |             |             | 912    | REF  |      |       | 89245 | REF         |             |             | 249193 | REF         |             |             |

Abbreviations: Obs, observed case number; SIR, standardized incidence ratio; SIR\_lb and SIR\_ub, lower and upper bounds of 95% confidence interval, respectively

<sup>a</sup>The referent group was all 54 occupational categories combined

<sup>b</sup>Expected count shown in square brackets when observed count was equal to zero

<sup>c</sup>Bolding denotes statistical significance (p<0.05)
